# Supplementary material
Source: HighWire-hosted journal article supplement (https://erj.ersjournals.com/content/57/3/2000754)
Supplement: inline-supplementary-material-1 [file inline-supplementary-material-1.pdf]

# **Mechanisms of Orthopnoea in Patients with Advanced COPD**

Amany F. Elbehairy, Azmy Faisal, Hannah McIsaac, Nicolle J. Domnik, Kathryn M. Milne, Matthew D. James, J. Alberto Neder, Denis E. O'Donnell, on behalf of the Canadian Respiratory Research Network

## **ONLINE DATA SUPPLEMENT**

### **Methods**

#### **Pulmonary function test**

Spirometry, body plethysmography, single-breath lung diffusing capacity for carbon monoxide ( $D_LCO$ ) and maximal inspiratory (MIP) and expiratory (MEP) mouth pressures were performed using automated equipment (Vmax229d, AutoboxV62J; SensorMedics, Yorba Linda, CA). Measurements were expressed relative to predicted normal values (1,2).

#### **Diaphragm electromyography and respiratory pressure measurements**

Diaphragm electromyography (EMGdi), oesophageal pressure (Pes) and gastric pressure (Pga) were measured continuously using a combined electrode-balloon catheter system (3-7). The EMGdi signal was sampled at 2000 Hz (PowerLab, model ML880; ADInstruments, Castle Hill, NSW, Australia), band-pass filtered between 20-1000 Hz (Bioamplifier model RA-8; Guangzhou Yinghui Medical Equipment Co. Ltd, Guangzhou, China) and converted to a root mean square (RMS) to assess respiratory neural activity. The data from the electrode pair showing the highest RMS value from the five electrode pairs in each inspiration was used for analysis. The oesophageal and gastric balloons were inflated with 1.0 mL and 1.2 mL of air, respectively. Pes and Pga were measured using differential pressure transducers (model DP15-34; Validyne Engineering, Northridge, CA, USA) and sampled at a rate of 100 Hz (PowerLab); trans-diaphragmatic pressure (Pdi) was calculated by subtraction of Pes from Pga. The continuous flow signal from the Vmax229d system (SensorMedics, Yorba Linda, CA) was simultaneously input into the data-acquisition system for analysis.

Maximal EMGdi (EMGdi,max) was determined as the highest inspiratory RMS from any sniff/inspiratory capacity manoeuvre performed during the test (8). Inspiratory sniffs were used to obtain maximum Pes (Pes,max) and maximum Pdi (Pdi,max) (6,9). Tidal Pes swings (Pes, tidal) were defined as the amplitude between the maximum expiratory value and minimum inspiratory value for each respiratory cycle. The tidal Pdi swing was defined as the amplitude of the Pdi waveform during tidal breathing.

End-inspiratory (EI) and end-expiratory (EE) data points of zero flow for Pes and Pga were collected. Dynamic compliance (CL,dyn) was calculated as the change in lung volume divided by change in Pes between EE and EI (10). Lung elastic work was calculated from the dynamic relation between Pes and lung volume in Campbell diagrams (11,12). Airway resistance was calculated as the difference in Pes divided by the difference in flow at inspiratory mid-volume and expiratory iso-volume ( $\Delta\text{Pes}/\Delta\text{flow}$ ) (10).

EMGdi<sub>%max</sub> was used as an index of inspiratory neural drive (IND) to the crural diaphragm. The ratio between EMGdi<sub>%max</sub> and tidal volume expressed relative to predicted vital capacity (EMGdi<sub>%max</sub>:VT<sub>%predVC</sub>) was used as an index of neuromechanical dissociation (NMD) of the respiratory system (9). Neuromuscular efficiency of the diaphragm was defined as the ratio of EMGdi<sub>%max</sub>:tidal Pdi<sub>%max</sub> (6).

## Results

Compared with healthy controls, patients with COPD had greater COPD assessment test (CAT) score, poorer health-related quality of life (St. George's Respiratory Questionnaire) and lower habitual physical activity (Community Healthy Activities Model Program for Seniors questionnaire), all  $p < 0.001$  (table E1). In average, patients had severe airflow obstruction [forced expiratory volume in one-second (FEV<sub>1</sub>):  $40 \pm 18$  %predicted] and 4/16 had moderate severity ( $80 > \text{FEV}_1 \geq 50$  %predicted). Table E1 also shows subjects' comorbid conditions and medications.

None of the subjects had significant cardiovascular or pulmonary vascular disease that could contribute to dyspnoea or orthopnoea.

In supine (vs. sitting), controls' inspiratory capacity (IC) increased by 0.48L ( $p<0.001$ ) (**figure E1**) likely reflecting lower end-expiratory lung volume (EELV). In contrast to controls, patients' IC and EELV were similar in both positions (**figure E1**).

Patients had greater dyspnoea in all 5 domains in both positions compared with healthy controls (all  $p<0.05$ ) and dyspnoea ratings increased significantly in the transition from seated to supine position in patients ( $p<0.05$ ), **figure E2**.

Fifteen of sixteen participants in each group accepted the insertion of the EMGdi-pressure catheter. EMGdi,max and Pdi,max were lower in supine versus sitting positions in both groups ( $p<0.05$ ) (**figure E3 and E4**). While tidal EMGdi and Pdi were not significantly different between positions, values were greater in COPD patients compared with controls regardless of the position.

EMGdi<sub>%max</sub> and tidal Pdi<sub>%max</sub> were greater in supine versus sitting position only in patients with COPD and values remained unaltered in healthy controls. Looking at individual EMGdi data (**figure E3**), 53% of patients showed a rise in tidal EMGdi in supine versus sitting position and the mean value tended to be higher while supine, though not significant. As such, higher EMGdi<sub>%max</sub> in supine versus sitting position in patients with COPD was a result of both higher numerator and lower denominator in variable combination. While in healthy controls, the majority (73%) showed a drop in their tidal EMGdi in supine versus sitting (**figure E3**). Similarly, higher tidal Pdi<sub>%max</sub> in supine versus sitting position in COPD patients was a result of higher tidal Pdi (i.e. numerator) and lower Pdi,max (i.e. denominator) in variable combination (**figure E4**).

## References

1. Briscoe WA, Dubois AB. The relationship between airway resistance, airway conductance and lung volume in subjects of different age and body size. *The Journal of clinical investigation* 1958;37:1279-85.
2. Crapo RO, Morris AH, Clayton PD, Nixon CR. Lung volumes in healthy nonsmoking adults. *Bulletin europeen de physiopathologie respiratoire* 1982;18:419-25.
3. Luo YM, Moxham J. Measurement of neural respiratory drive in patients with COPD. *Respir Physiol Neurobiol* 2005;146:165-74.
4. Luo YM, Moxham J, Polkey MI. Diaphragm electromyography using an oesophageal catheter: current concepts. *Clin Sci (Lond)* 2008;115:233-44.
5. Jolley CJ, Luo YM, Steier J et al. Neural respiratory drive in healthy subjects and in COPD. *Eur Respir J* 2009;33:289-97.
6. Ciavaglia CE, Guenette JA, Langer D, Webb KA, Alberto Neder J, O'Donnell DE. Differences in respiratory muscle activity during cycling and walking do not influence dyspnea perception in obese patients with COPD. *J Appl Physiol* (1985) 2014;117:1292-301.
7. Jolley CJ, Luo YM, Steier J, Rafferty GF, Polkey MI, Moxham J. Neural respiratory drive and breathlessness in COPD. *Eur Respir J* 2015;45:355-64.
8. Sinderby C, Beck J, Spahija J, Weinberg J, Grassino A. Voluntary activation of the human diaphragm in health and disease. *J Appl Physiol* (1985) 1998;85:2146-58.
9. Guenette JA, Chin RC, Cheng S et al. Mechanisms of exercise intolerance in global initiative for chronic obstructive lung disease grade 1 COPD. *Eur Respir J* 2014;44:1177-87.
10. Tobin MJ. Monitoring respiratory mechanics in spontaneously breathing patients. In: Tobin MJ, editor *Principles and Practice of Intensive Care Monitoring*. New York: McGraw-Hill, 1997:617-654.
11. Agostoni E, Mead J. Statics of the respiratory system. In: Fenn WO, Rahn R, editors. *Handbook of Physiology Respiration*. Washington DC: American Physiological Society, 1964.:387-409.
12. Dominelli PB, Sheel AW. Experimental approaches to the study of the mechanics of breathing during exercise. *Respir Physiol Neurobiol* 2012;180:147-61.

**Table E1: Subjects Characteristics**

| Variable                                     | COPD (n=16) | CTRL (n=16) |
|----------------------------------------------|-------------|-------------|
| CAT score (0-40)                             | 21.3±7.8*   | 4.3±3.5     |
| SGRQ total score                             | 50.7±14.3*  | 3.4±1.8     |
| CHAMPS, kcal/wk for all activities           | 2102±1843*  | 5342±4240   |
| Comorbidities, no of subjects (%)            |             |             |
| ▪ Hypertension                               | 7 (44)      | 6 (38)      |
| ▪ Diabetes Mellitus                          | 2 (13)      | 2 (13)      |
| ▪ Ischaemic heart disease                    | 3 (19)      | 0 (0)       |
| ▪ Hypercholesterolemia                       | 6 (38)      | 5 (31)      |
| ▪ Anxiety                                    | 2 (13)      | 2 (13)      |
| ▪ Depression                                 | 3 (19)      | 2 (13)      |
| ▪ Osteoporosis                               | 3 (19)      | 0 (0)       |
| Inhaled medication usage, no of subjects (%) |             |             |
| ▪ SABA                                       | 15 (94)     | 0 (0)       |
| ▪ SAMA                                       | 7 (44)      | 0 (0)       |
| ▪ LAMA                                       | 5 (31)      | 0 (0)       |
| ▪ Combined LABA/LAMA                         | 8 (50)      | 0 (0)       |
| ▪ ICS                                        | 7 (44)      | 0 (0)       |
| ▪ Combined ICS/LABA                          | 5 (31)      | 0 (0)       |
| Other medications, no. of subjects (%)       |             |             |
| ▪ Anti-hypertensive                          | 7 (44)      | 6 (38)      |
| ▪ Statin                                     | 6 (38)      | 5 (31)      |
| ▪ Anti-depressant                            | 3 (19)      | 2 (13)      |
| ▪ Thyroid replacement                        | 1 (6)       | 1 (6)       |
| ▪ Anti-angina medication                     | 2 (13)      | 0 (0)       |
| ▪ Aspirin                                    | 2 (13)      | 1 (6)       |

Values are means±SD.

\* p<0.05 COPD vs. CTRL group.

*Abbreviations:* CAT= COPD Assessment Test; CHAMPS= Community Healthy Activities Model Program for Seniors questionnaire; COPD= chronic obstructive pulmonary disease; CTRL= healthy controls; ICS= inhaled corticosteroid; LABA= long-acting beta<sub>2</sub>-agonist; LAMA= long-acting muscarinic antagonist; SABA= short-acting beta<sub>2</sub>-agonist; SAMA= short-acting muscarinic antagonist; SGRQ= St. George's Respiratory Questionnaire.
