# Supplementary material
Source: HighWire-hosted journal article supplement (https://erj.ersjournals.com/content/57/3/2000754)
Supplement: inline-supplementary-material-6 [file inline-supplementary-material-6.pdf]

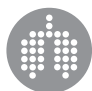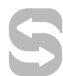

SHAREABLE PDF

# Mechanisms of orthopnoea in patients with advanced COPD

Amany F. Elbehairy <sup>1,2</sup>, Azmy Faisal <sup>3,4</sup>, Hannah McIsaac<sup>1</sup>, Nicolle J. Domnik <sup>1</sup>, Kathryn M. Milne <sup>1,5</sup>, Matthew D. James<sup>1</sup>, J. Alberto Neder <sup>1</sup> and Denis E. O'Donnell <sup>1</sup>, on behalf of the Canadian Respiratory Research Network

**Affiliations:** <sup>1</sup>Division of Respiratory Medicine, Dept of Medicine, Queen's University and Kingston Health Sciences Centre, Kingston, ON, Canada. <sup>2</sup>Dept of Chest Diseases, Faculty of Medicine, Alexandria University, Alexandria, Egypt. <sup>3</sup>Dept of Sport and Exercise Sciences, Manchester Metropolitan University, Manchester, UK. <sup>4</sup>Faculty of Physical Education for Men, Alexandria University, Alexandria, Egypt. <sup>5</sup>Clinician Investigator Program, Dept of Medicine, University of British Columbia, Vancouver, BC, Canada.

**Correspondence:** Denis O'Donnell, 102 Stuart Street, Kingston, Ontario, Canada, K7L 2V6.  
E-mail: [odonnell@queensu.ca](mailto:odonnell@queensu.ca)

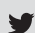

@ERSpublications

**Orthopnoea, a troublesome symptom in patients with severe COPD, is associated with increased neural drive to the diaphragm and heightened respiratory effort to compensate for abrupt augmentation of load-capacity imbalance of the inspiratory muscles** <https://bit.ly/2ZLvyiI>

**Cite this article as:** Elbehairy AF, Faisal A, McIsaac H, *et al.* Mechanisms of orthopnoea in patients with advanced COPD. *Eur Respir J* 2021; 57: 2000754 [<https://doi.org/10.1183/13993003.00754-2020>].

This single-page version can be shared freely online.

**ABSTRACT** Many patients with severe chronic obstructive pulmonary disease (COPD) report an unpleasant respiratory sensation at rest, which is further amplified by adoption of a supine position (orthopnoea). The mechanisms of this acute symptomatic deterioration are poorly understood.

Sixteen patients with advanced COPD and a history of orthopnoea and 16 age- and sex-matched healthy controls underwent pulmonary function tests (PFTs) and detailed sensory-mechanical measurements including inspiratory neural drive (IND) assessed by diaphragm electromyography (EMG<sub>di</sub>), oesophageal pressure ( $P_{es}$ ) and gastric pressure ( $P_{ga}$ ), in both sitting and supine positions.

Patients had severe airflow obstruction (forced expiratory volume in 1 s (FEV<sub>1</sub>): 40±18% pred) and lung hyperinflation. Regardless of the position, patients had lower inspiratory capacity (IC) and higher IND for a given tidal volume ( $V_T$ ) (*i.e.* greater neuromechanical dissociation (NMD)), higher intensity of breathing discomfort, higher minute ventilation ( $V'_E$ ) and higher breathing frequency ( $f_B$ ) compared with controls (all  $p<0.05$ ). For controls in a supine position, IC increased by 0.48 L *versus* sitting erect, with a small drop in  $V'_E$ , mainly due to reduced  $f_B$  (all  $p<0.05$ ). By contrast, IC remained unaltered in patients with COPD, but dynamic lung compliance ( $C_{Ldyn}$ ) decreased ( $p<0.05$ ) in the supine position. Breathing discomfort, inspiratory work of breathing (WOB), inspiratory effort, IND, NMD and neuroventilatory uncoupling all increased in COPD patients in the supine position ( $p<0.05$ ), but not in the healthy controls. Orthopnoea was associated with acute changes in IND ( $r=0.65$ ,  $p=0.01$ ), neuroventilatory uncoupling ( $r=0.76$ ,  $p=0.001$ ) and NMD ( $r=0.73$ ,  $p=0.002$ ).

In COPD, onset of orthopnoea coincided with an abrupt increase in elastic loading of the inspiratory muscles in recumbency, in association with increased IND and greater NMD of the respiratory system.
